# Supplementary material for: Pituitary–Adrenal Axis and Peripheral Immune Cell Profile in Long COVID
Source: MDPI journal article supplement (doi:10.3390/biomedicines12030581), 2024-03-05
Supplement: s1 [file s1]

## Supplementary data

### **Pituitary-adrenal axis and peripheral immune cell profile in Long COVID**

Jaume Alijotas-Reig (1,2,3), Ariadna Anunciacion-Llunell (1), Enrique Esteve-Valverde (4), Stephanie Morales-Pérez (5), Sergio Rivero-Santana (5), Jaume Trapé (6,7), Laura Gonzalez-Garcia (6,7), Domingo Ruiz (5), Joana Marques-Soares (1,2,3), Francesc Miro-Mur (1)

(1) Systemic Autoimmune Diseases Research Unit, Vall d'Hebron Institut de Recerca (VHIR), Barcelona 08035, Catalonia, Spain.

(2) Systemic Autoimmune Diseases Unit, Department of Internal Medicine, Hospital Universitari Vall d'Hebron (HUVH), 08035 Barcelona, Catalonia, Spain.

(3) Department of Medicine, Faculty of Medicine, Universitat Autònoma de Barcelona (UAB), 08035 Barcelona, Catalonia, Spain.

(4) Systemic Autoimmune Diseases Unit, Department of Internal Medicine, Hospital Universitari Parc Taulí, 08208 Sabadell, Catalonia, Spain.

(5) Internal Medicine Department, Althaia Healthcare University Network of Manresa, Systemic Autoimmune Disease Unit, 08243 Manresa, Catalonia, Spain.

(6) Laboratory Medicine, Althaia Healthcare University Network of Manresa 08243 Manresa, Catalonia, Spain.

(7) Tissue Repair and Regeneration Laboratory (TR2Lab), Institut de Recerca i Innovació en Ciències de la Vida i de la Salut a la Catalunya Central (IrisCC), 08500 Vic, Catalonia, Spain

**Corresponding authors:** jaume.alijotas@vallhebron.cat (J.A.-R.); francesc.miro@vhir.org (F.M.-M.); Tel.: +34934894194 (J.A.-R.); +34934894047 (F.M.-M.)

## Supplementary tables

*Table S1. Comparison of clinical parameters between Long COVID and recovered patients.*

| Parameter            | Reference value | Long-COVID    |                | P-value |
|----------------------|-----------------|---------------|----------------|---------|
|                      |                 | No            | Yes            |         |
| Haemoglobin (g/dL)   | 12.0-15.0       | 14.4 [1.7]    | 14.2 [2.1]     | 0.67    |
| Leukocytes (x10e9/L) | 4.0-11.0        | 5.7 [1.44]    | 5.6 [1.34]     | 0.96    |
| Platelets (x10e9/L)  | 140.0-400.0     | 257 [88]      | 211 [50]       | 0.26    |
| ESR (mm/h)           | 0.0-25.0        | 12 [11]       | 10 [12]        | 0.21    |
| PT (ratio)           | 0.7-1.2         | 1 [0.06]      | 1 [0.11]       | 0.73    |
| aPTT (ratio)         | 0.7-1.2         | 1 [0.01]      | 1 [0]          | 0.76    |
| D-dimer (ng/mL)      | 0.0-240.0       | 82 [43.25]    | 76 [75]        | 0.39    |
| TSH (mUI/L)          | 0.37-4.7        | 2.25 [1.47]   | 1.59 [1.29]    | 0.26    |
| ACTH (µg/dL)         | 18.0-25.0       | 13 [4.75]     | 17.5 [11.75]   | 0.53    |
| NT-proBNP (pg/mL)    | 0.5.0-30.0      | 25.5 [6.2]    | 35.6 [33.2]    | 0.15    |
| C3 (mg/dL)           | 88.0-201.0      | 109 [15.35]   | 103.15 [24.08] | 0.35    |
| C4 (mg/dL)           | 15.0-45.0       | 22.8 [6.75]   | 23.75 [8.07]   | 0.71    |
| Creatinine (mg/dL)   | 0.51-0.95       | 0.67 [0.26]   | 0.7 [0.24]     | 0.61    |
| GF (mL/min/1.73m2)   | 90.0-120.0      | 99.27 [18.53] | 96.56 [15.3]   | 0.88    |
| Urate (mg/dL)        | 2.6-6.0         | 5.2 [1.55]    | 4.5 [1.65]     | 0.68    |
| Cholesterol (mg/dL)  | 132.0-240.0     | 202 [23]      | 193 [39.5]     | 0.43    |
| HDL (mg/dL)          | 40.0-100.0      | 51 [20]       | 52 [13.25]     | 0.62    |
| LDL (mg/dL)          | 0.0-130.0       | 121 [41]      | 111 [39]       | 0.63    |
| Triglyceride (mg/dL) | 43.0-200.0      | 77 [38]       | 106 [63]       | 0.61    |
| Protein (g/dL)       | 6.6-8.3         | 6.49 [0.27]   | 6.59 [0.44]    | 0.16    |
| Albumin (g/dL)       | 3.5-5.2         | 3.91 [0.15]   | 4.1 [0.25]     | 0.08    |
| ALT (IU/L)           | 7.0-35.0        | 17 [5]        | 16.5 [15.5]    | 0.74    |
| AST (IU/L)           | 10.0-35.0       | 15 [4]        | 18 [6]         | 0.08    |
| GGT (IU/L)           | 6.0-38.0        | 18 [13]       | 20.5 [21.5]    | 0.75    |
| Calcium (mg/dL)      | 8.8-10.6        | 8.79 [0.44]   | 9.02 [0.28]    | 0.16    |
| Magnesium (mg/dL)    | 1.9-2.5         | 1.97 [0.23]   | 2.02 [0.21]    | 0.95    |
| LDH (IU/L)           | 120.0-246.0     | 163 [27.5]    | 164.5 [18.25]  | 0.80    |
| CK (IU/L)            | 0.0-174.0       | 94 [61.5]     | 97 [74]        | 0.98    |
| Ferritin (ng/mL)     | 25.0-250.0      | 93 [119]      | 123.5 [132.75] | 0.61    |
| CRP (mg/L)           | 0.0-10.0        | 2.1 [5.6]     | 1.55 [3.7]     | 0.66    |
| RF (IU/mL)           | 0.0-14.0        | 9.7 [2.53]    | 9.05 [1.92]    | 0.31    |
| ACE-2 (mmol/mL/min)  | 0.0-40.0        | 25.95 [15.93] | 23.9 [14.5]    | 0.83    |
| IgM (mg/dL)          | 40.0-230.0      | 94.5 [49.75]  | 108 [62]       | 0.43    |
| IgG (mg/dL)          | 700.0-1600.0    | 949.5 [298]   | 957 [229.75]   | 0.70    |
| IgA (mg/dL)          | 70.0-400.0      | 244 [149.7]   | 194.5 [140.75] | 0.18    |
| IgE (kU/L)           | 0.0-150.0       | 13.5 [12.2]   | 26.2 [54.92]   | 0.24    |

Data is median [interquartile range (IQR)]. ESR, erythrocyte sedimentation rate; PT, prothrombin time; aPTT, activated partial thromboplastin time; TSH, thyrotropin; NT-proBNP, N-terminal pro-B type natriuretic peptide; C3 complement component 3; C4, complement component 4; GF, glomerular filtrate; HDL, low density lipoproteins; HDL, high density lipoproteins; ALT, alanine amino transferase; AST, aspartate amino transferase; GGT, gamma-glutamyl transferase; LDH, lactate dehydrogenase; CK creatine kinase; CRP, C-reactive protein; RF, rheumatoid factor; ACE2, angiotensin converting enzyme-2; Ig, immunoglobulin. Mann-Whitney U test showed no differences in any clinical laboratory variable between individuals with and without Long COVID.

*Table S2. Long COVID symptoms in participants with Long COVID or not.*

| Variables                 | Long COVID |            | p-value |
|---------------------------|------------|------------|---------|
|                           | No (13)    | Yes (29)   |         |
| Abdominal cramps          | 1 (7.69)   | 1 (3.45)   | 0.53    |
| Ageusia                   | 0 (0)      | 3 (10.34)  | 0.54    |
| Alternate bowel movements | 1 (7.69)   | 0 (0)      | 0.31    |
| Anosmia                   | 0 (0)      | 2 (7.14)   | 1.00    |
| Anxiety                   | 1 (7.69)   | 17 (58.62) | 0.0024  |
| Arthralgia                | 0 (0)      | 16 (55.17) | 0.0005  |
| Fatigue                   | 2 (15.38)  | 28 (96.55) | 0.0000  |
| Cefalea                   | 0 (0)      | 6 (20.69)  | 0.15    |
| Depressive symptoms       | 2 (15.38)  | 13 (44.83) | 0.09    |
| Diarrhea                  | 1 (7.69)   | 0 (0)      | 0.31    |
| Dyspnea                   | 0 (0)      | 14 (48.28) | 0.0016  |
| Fever of unknown origin   | 0 (0)      | 1 (3.45)   | 1.00    |
| Lack of concentration     | 1 (7.69)   | 12 (41.38) | 0.0358  |
| Loss of voice             | 0 (0)      | 2 (6.9)    | 1.00    |
| Memory loss               | 1 (7.69)   | 10 (34.48) | 0.13    |
| Myalgia                   | 1 (7.69)   | 18 (62.07) | 0.0018  |
| Paresthesia               | 0 (0)      | 2 (6.9)    | 1.00    |
| Persistent cough          | 0 (0)      | 9 (31.03)  | 0.0382  |
| Persistent sore throat    | 0 (0)      | 8 (27.59)  | 0.0427  |
| Rhinitis                  | 0 (0)      | 3 (10.34)  | 0.54    |
| Sexual disorder           | 0 (0)      | 3 (10.34)  | 0.54    |
| Thoracic pain             | 0 (0)      | 4 (13.79)  | 0.29    |
| Tinnitus                  | 0 (0)      | 1 (3.45)   | 1.00    |

Data are n (%). Fisher's exact test.

*Table S3. Long COVID symptoms in our cohort of participants having less than 2-fold cortisol induction in the ACTH stimulation test.*

| Variables                 | Fold cortisol |            | p-value |
|---------------------------|---------------|------------|---------|
|                           | < 2 (n=12)    | ≥ 2 (n=30) |         |
| Abdominal cramps          | 0 (0)         | 2 (6.9)    | 1.00    |
| Ageusia                   | 1 (7.69)      | 2 (6.9)    | 1.00    |
| Alternate bowel movements | 0 (0)         | 1 (3.45)   | 1.00    |
| Anosmia                   | 1 (7.69)      | 1 (3.57)   | 0.54    |
| Anxiety                   | 6 (46.15)     | 12 (41.38) | 1.00    |
| Arthralgia                | 6 (46.15)     | 10 (34.48) | 0.51    |
| Fatigue                   | 11 (84.62)    | 19 (65.52) | 0.28    |
| Cefalea                   | 2 (15.38)     | 4 (13.79)  | 1.00    |
| Depressive symptoms       | 7 (53.85)     | 8 (27.59)  | 0.16    |
| Diarrhea                  | 0 (0)         | 1 (3.45)   | 1.00    |
| Dyspnea                   | 6 (46.15)     | 8 (27.59)  | 0.30    |
| Fever of unknown origin   | 1 (7.69)      | 0 (0)      | 0.31    |
| Lack of concentration     | 5 (38.46)     | 8 (27.59)  | 0.49    |
| Loss of voice             | 1 (7.69)      | 1 (3.45)   | 0.53    |
| Memory loss               | 4 (30.77)     | 7 (24.14)  | 0.71    |
| Myalgia                   | 8 (61.54)     | 11 (37.93) | 0.19    |
| Paresthesia               | 0 (0)         | 2 (6.9)    | 1.00    |
| Persistent cough          | 8 (61.54)     | 1 (3.45)   | 0.0001  |
| Persistent sore throat    | 6 (46.15)     | 2 (6.9)    | 0.0063  |
| Rhinitis                  | 3 (23.08)     | 0 (0)      | 0.0249  |
| Sexual disorder           | 1 (7.69)      | 2 (6.9)    | 1.00    |
| Thoracic pain             | 2 (15.38)     | 2 (6.9)    | 0.58    |
| Tinnitus                  | 1 (7.69)      | 0 (0)      | 0.31    |

Data are n (%). Fisher's exact test.

*Table S4. Number of leukocyte subpopulations in patients with and without Long COVID.*

| Cell population | Long COVID      |                | p-value |
|-----------------|-----------------|----------------|---------|
|                 | yes             | no             |         |
| B cells         | 135.81 [42.03]  | 137.24 [51.67] | 0.80    |
| T cells         | 894.7 [343.11]  | 911.97 [340.2] | 0.49    |
| CD4 T cells     | 519.56 [247.53] | 535.87 [354.8] | 0.80    |
| CD8 T cells     | 257.65 [115.89] | 295.6 [176.12] | 0.41    |
| CD4cm           | 282.64 [107.22] | 245.55 [89.34] | 0.49    |
| CD4em           | 56.62 [49.57]   | 59.44 [18.49]  | 0.98    |
| CD4emra         | 1.83 [4.17]     | 5.99 [6.48]    | 0.21    |
| CD8cm           | 83.3 [42.58]    | 66.37 [50]     | 0.35    |

|                           |                   |                  |        |
|---------------------------|-------------------|------------------|--------|
| CD8em                     | 26.27 [24.79]     | 37.03 [32.38]    | 0.27   |
| CD8emra                   | 24.98 [57.57]     | 58.24 [67.63]    | 0.39   |
| Yδ TCR cells              | 24.6 [16.51]      | 20.05 [19.7]     | 0.86   |
| NK cells                  | 126.21 [112.96]   | 156.54 [95.4]    | 0.22   |
| NKT cells                 | 32.35 [45.28]     | 32.02 [27.8]     | 0.83   |
| Monocytes                 | 354.78 [152.36]   | 435.21 [141.89]  | 0.37   |
| Monocytes CD14hi          | 286.91 [134.51]   | 334.4 [157.33]   | 0.41   |
| Monocytes CD14lo          | 41.41 [21.28]     | 51.82 [20.5]     | 0.22   |
| Neutrophils               | 2616.98 [1289.19] | 3780.34 [747.87] | 0.0277 |
| Exhausted B cells         | 5.66 [4.88]       | 3 [6.38]         | 0.25   |
| Mature B cells            | 36.37 [19.35]     | 27.92 [17.15]    | 0.18   |
| HLA-DR+CD38+ CD4          | 6.94 [4.52]       | 5.77 [6.25]      | 0.54   |
| CD38+ CD4                 | 67.57 [71.09]     | 89.58 [101.66]   | 0.83   |
| HLA-DR+CD38+ CD8          | 9.45 [8.6]        | 7.61 [3.92]      | 0.65   |
| CD38+ CD8                 | 33.57 [28.16]     | 36.84 [26.83]    | 0.39   |
| CD39+CD73+ CD4            | 0.17 [0.45]       | 0.17 [0.27]      | 0.30   |
| CD39+ CD4                 | 12.31 [12.62]     | 12.5 [26.88]     | 0.59   |
| CD39+CD73+ CD8            | 0.62 [0.64]       | 0.49 [1.35]      | 0.92   |
| CD39+ CD8                 | 3.75 [2.73]       | 3.8 [5.78]       | 0.68   |
| CD73+ CD4                 | 8.34 [12.31]      | 5.24 [4.2]       | 0.19   |
| CD73+ CD8                 | 13.92 [17.1]      | 8.35 [18.03]     | 0.62   |
| CD103+ CD4                | 4.28 [1.93]       | 3.66 [2.21]      | 0.54   |
| CD69+ CD4                 | 1.37 [3.66]       | 1 [0.89]         | 0.16   |
| CD69+CD103+ CD4           | 0 [0.07]          | 0 [0]            | 0.27   |
| CD103+ CD8                | 8.45 [5.89]       | 6.31 [3.54]      | 0.08   |
| CD69+ CD8                 | 1.92 [1.53]       | 1.31 [1.4]       | 0.46   |
| CD69+CD103+ CD8           | 0 [0.1]           | 0 [0.09]         | 0.76   |
| Treg cells                | 7.46 [7.4]        | 6.26 [8.23]      | 0.51   |
| CD39+ CD73+ Treg cells    | 0.06 [0.1]        | 0 [0]            | 0.08   |
| CD39+ Treg cells          | 1.46 [3.51]       | 1.03 [2.16]      | 1.00   |
| CD73+ Treg cells          | 0.12 [0.26]       | 0.08 [0.18]      | 0.40   |
| HLA-DR+CD38+ NK cells     | 4.57 [6.66]       | 2.87 [2.07]      | 0.59   |
| CD38+ NK cells            | 61.78 [56.36]     | 106.86 [74.19]   | 0.19   |
| CD39+CD73+ NK cells       | 0.53 [0.8]        | 0.61 [0.59]      | 0.70   |
| CD69+ NK cells            | 0.71 [0.61]       | 0.95 [1.12]      | 0.50   |
| HLA-DR+CD38+ Yδ TCR cells | 0.13 [0.24]       | 0.15 [0.6]       | 1.00   |
| CD38+ Yδ TCR cells        | 0.34 [0.48]       | 0.97 [1.32]      | 0.27   |
| CD69+ Yδ TCR cells        | 0.12 [0.16]       | 0.11 [0.1]       | 0.92   |
| CD73+ B cells             | 42.89 [49.25]     | 50.21 [54.07]    | 0.44   |
| CD162+ B cells            | 13.3 [11.18]      | 10.2 [6.8]       | 0.77   |
| CD38+ B cells             | 66.98 [48.27]     | 80.47 [53.71]    | 0.22   |
| HLA-DR+CD38+ Monocytes    | 247.88 [131.42]   | 333.77 [158.1]   | 0.22   |
| CD39+ Monocytes           | 157.99 [73.26]    | 102.75 [119.93]  | 0.18   |

|                          |              |              |      |
|--------------------------|--------------|--------------|------|
| CD73+CD39+ Monocytes     | 6.58 [9.95]  | 6.28 [8.22]  | 0.54 |
| HLA-DR+CD38+ Neutrophils | 6.53 [12.19] | 6.39 [18.03] | 0.92 |

Cell number is median [interquartile range (IQR)]  $10^6/L$ . cm, central memory; em, effector memory; emra, effector memory CD45RA positive; NK, natural killer; Treg, regulatory T cells. Mann-Whitney U-statistical test.

*Table S5. Frequency of leukocyte subpopulations in patients with and without Long COVID.*

| Cell population          | Long-COVID    |               | p-value |
|--------------------------|---------------|---------------|---------|
|                          | Yes           | No            |         |
| B cells                  | 2.97 (1.49)   | 2.66 (2.24)   | 0.36    |
| T cells                  | 20.85 (6.38)  | 17.40 (3.50)  | 0.0423  |
| CD4 T cells              | 62.1 (14.2)   | 60.65 (9.50)  | 0.74    |
| CD8 T cells              | 28.85 (13.18) | 30.95 (10.3)  | 0.57    |
| CD4cm                    | 55.8 (15.55)  | 51.9 (10.95)  | 0.29    |
| CD4em                    | 12.6 (9.32)   | 12.35 (4.93)  | 0.71    |
| CD4emra                  | 0.365 (1.01)  | 0.94 (0.47)   | 0.25    |
| CD8cm                    | 40.00 (20.1)  | 27.25 (9.85)  | 0.09    |
| CD8em                    | 10.15 (9.65)  | 11.68 (7.58)  | 0.90    |
| CD8emra                  | 11.65 (21.42) | 23.1 (30.24)  | 0.49    |
| $\gamma\delta$ TCR cells | 2.54 (2.55)   | 2.21 (0.90)   | 0.76    |
| NK cells                 | 8.65 (7.27)   | 10.03 (9.07)  | 0.25    |
| NKT cells                | 2.70 (3.54)   | 1.95 (2.96)   | 0.70    |
| Monocytes                | 8.63 (2.48)   | 7.00 (2.28)   | 0.11    |
| Monocytes CD14hi         | 79.50 (3.78)  | 79.40 (6.65)  | 0.82    |
| Monocytes CD14lo         | 12.65 (4.63)  | 15.20 (5.24)  | 0.22    |
| Neutrophils              | 99.05 (1.33)  | 98.95 (0.78)  | 0.63    |
| Exhausted B cells        | 3.86 (4.96)   | 2.35 (2.17)   | 0.09    |
| Mature B cells           | 25.80 (13.40) | 17.90 (9.20)  | 0.0298  |
| HLA-DR+CD38+ CD4         | 1.50 (0.78)   | 1.16 (0.31)   | 0.12    |
| CD38+ CD4                | 13.25 (7.62)  | 15.30 (10.29) | 0.68    |
| HLA-DR+CD38+ CD8         | 2.77 (1.89)   | 2.24 (1.39)   | 0.29    |
| CD38+ CD8                | 10.81 (5.08)  | 13.66 (7.83)  | 0.46    |
| CD39+CD73+ CD4           | 0.04 (0.08)   | 0.02 (0.04)   | 0.14    |
| CD39+ CD4                | 1.97 (2.78)   | 2.54 (2.76)   | 0.80    |
| CD39+CD73+ CD8           | 0.19 (0.32)   | 0.21 (0.27)   | 0.87    |
| CD39+ CD8                | 1.33 (1.12)   | 1.11 (0.90)   | 0.53    |
| CD73+ CD4                | 1.72 (2.22)   | 0.81 (1.18)   | 0.21    |
| CD73+ CD8                | 5.07 (5.61)   | 2.58 (3.56)   | 0.31    |
| CD103+ CD4               | 0.72 (0.45)   | 0.67 (0.18)   | 0.66    |
| CD69+ CD4                | 0.29 (0.36)   | 0.14 (0.18)   | 0.17    |
| CD69+CD103+ CD4          | 0.00 (0.01)   | 0.00 (0.00)   | 0.20    |

|                                   |               |               |        |
|-----------------------------------|---------------|---------------|--------|
| CD103+ CD8                        | 2.78 (1.43)   | 1.99 (0.48)   | 0.0330 |
| CD69+ CD8                         | 0.52 (0.60)   | 0.40 (0.26)   | 0.54   |
| CD69+CD103+ CD8                   | 0.00 (0.03)   | 0.00 (0.02)   | 0.73   |
| Treg cells                        | 0.84 (0.94)   | 0.72 (0.94)   | 0.63   |
| CD39+ CD73+ Treg cells            | 0.49 (1.11)   | 0.00 (0.00)   | 0.0270 |
| CD39+ Treg cells                  | 37.05 (35.48) | 44.89 (27.78) | 0.31   |
| CD73+ Treg cells                  | 2.20 (2.86)   | 0.53 (1.98)   | 0.10   |
| HLA-DR+CD38+ NK cells             | 3.72 (6.41)   | 2.36 (2.75)   | 0.35   |
| CD38+ NK cells                    | 60.45 (30.08) | 72.16 (21.07) | 0.59   |
| CD39+CD73+ NK cells               | 0.36 (1.45)   | 0.39 (0.41)   | 0.63   |
| CD69+ NK cells                    | 0.54 (0.70)   | 0.44 (0.58)   | 0.94   |
| HLA-DR+CD38+ Y $\delta$ TCR cells | 0.92 (1.66)   | 1.06 (2.93)   | 0.98   |
| CD38+ Y $\delta$ TCR cells        | 2.47 (2.93)   | 4.93 (4.27)   | 0.31   |
| CD69+ Y $\delta$ TCR cells        | 0.80 (1.26)   | 0.56 (0.35)   | 0.53   |
| CD73+ B cells                     | 31.50 (24.85) | 24.55 (18.00) | 0.89   |
| CD162+ B cells                    | 9.92 (6.61)   | 6.44 (3.38)   | 0.13   |
| CD38+ B cells                     | 53.80 (12.45) | 60.45 (8.07)  | 0.23   |
| HLA-DR+CD38+ Monocytes            | 70.10 (21.10) | 73.35 (6.30)  | 0.78   |
| CD39+ Monocytes                   | 49.37 (28.20) | 29.85 (20.13) | 0.08   |
| CD73+CD39+ Monocytes              | 1.82 (2.08)   | 1.52 (1.94)   | 0.33   |
| HLA-DR+CD38+ Neutrophils          | 0.24 (0.47)   | 0.17 (0.45)   | 0.79   |

Data is N (%). Frequency is from its parental gating (see supplementary figure S4 for strategy of gating). cm, central memory; em, effector memory; emra, effector memory CD45RA positive; NK, natural killer; Treg, regulatory T cells. Fisher's exact test.

*Table S6. Serum cytokine levels in patients with Long COVID compared with those of recovered patients.*

| Cytokine     | Long COVID   |               | p-value |
|--------------|--------------|---------------|---------|
|              | No (N=9)     | Yes (n=25)    |         |
| IL-6         | 2.92 [2.64]  | 2.60 [1.40]   | 0.75    |
| TNF $\alpha$ | 0.04 [0.03]  | 0.06 [0.14]   | 0.70    |
| IFN $\gamma$ | 0.24 [0.23]  | 0.22 [0.48]   | 0.82    |
| IL-1 $\beta$ | 0.22 [0.10]  | 0.34 [0.40]   | 0.67    |
| IL-2         | 0.25 [0.29]  | 0.29 [0.62]   | 0.75    |
| IL-10        | 13.97 [3.74] | 20.12 [15.5]  | 0.11    |
| IL-12p40     | 9.27 [6.75]  | 16.08 [29.18] | 0.70    |
| IL-12p70     | 0.36 [0.17]  | 0.54 [0.18]   | 0.67    |
| GDF-8        | 0.50 [0.17]  | 0.50 [0.51]   | 0.75    |

Cytokine values are expressed as median [interquartile range (IQR)]. Units of cytokines are pg/ml, except for GDF-8 that are ng/ml. Mann-Whitney U test.

## Supplementary Figures

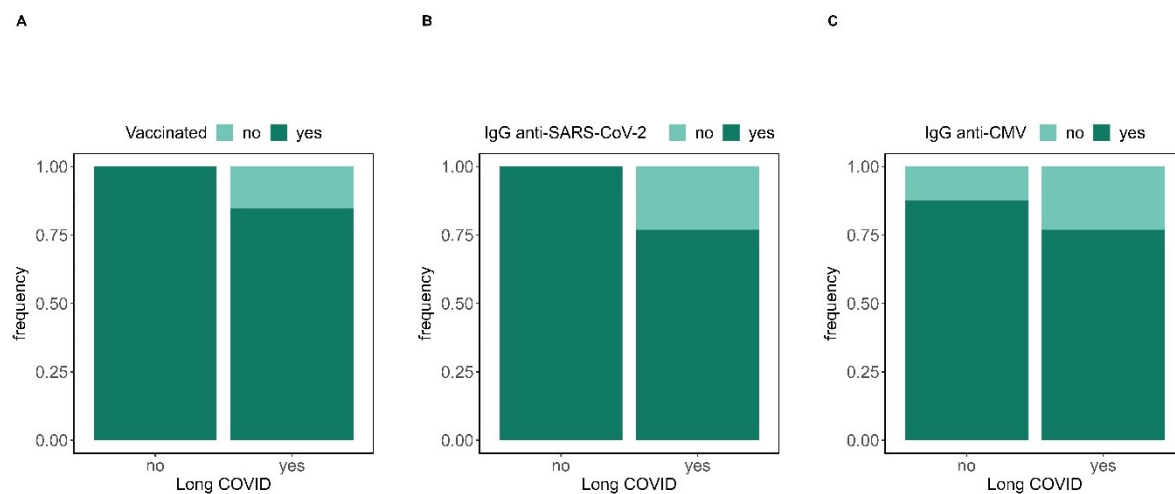

Figure S1. anti-SARS-CoV-2 vaccination rates. Frequency of vaccinated anti-SARS-CoV-2 participants (A), percentage of participants with antibodies against SARS-CoV-2 spike protein (B), or anti-CMV (C), segregated by having or not Long COVID.

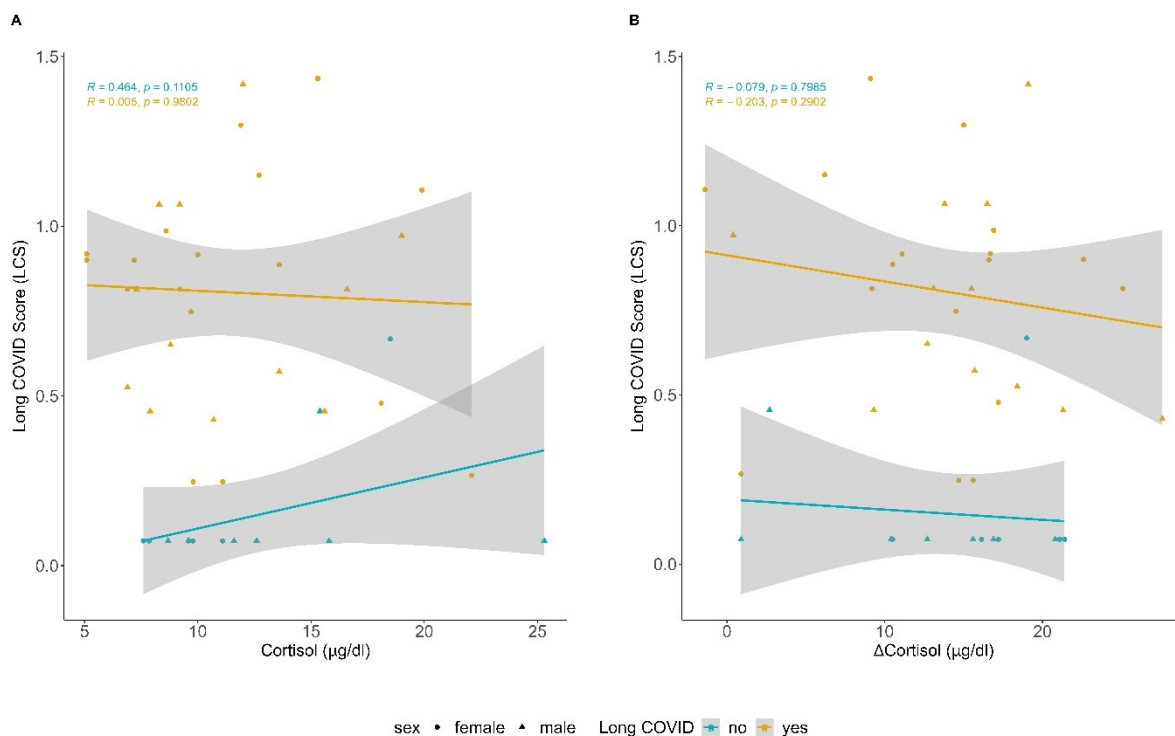

Figure S2. Association of Long COVID Score (LCS) with cortisol levels. Correlation of Long COVID Score (LCS) with basal cortisol levels (A) or  $\Delta$ Cortisol levels (B). Sex of participants is indicated by two different shape symbols. Spearman correlation test.



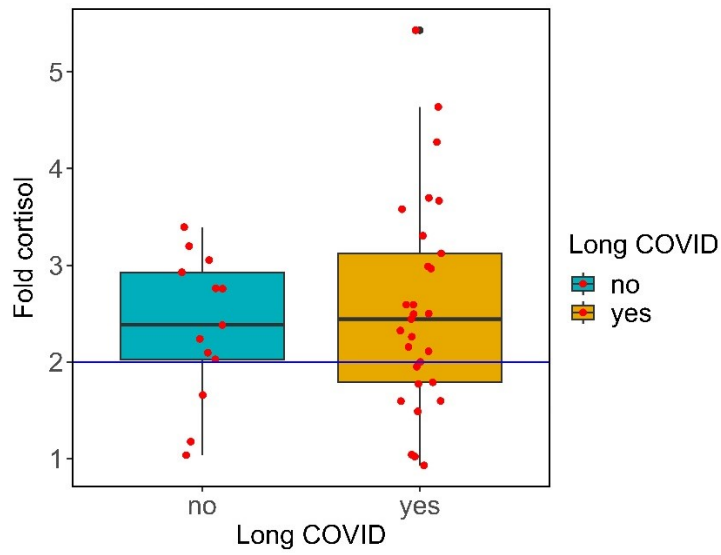

Figure S3. Fold cortisol induction in ACTH stimulation test. Fold cortisol induction after 1 hour of ACTH stimulation test between patients with Long COVID and recovered individuals. Those participants with less than a 2-fold induction are below the horizontal blue line and they are referred as non-responders to ACTH stimulation test.

## Supplementary Figure S4

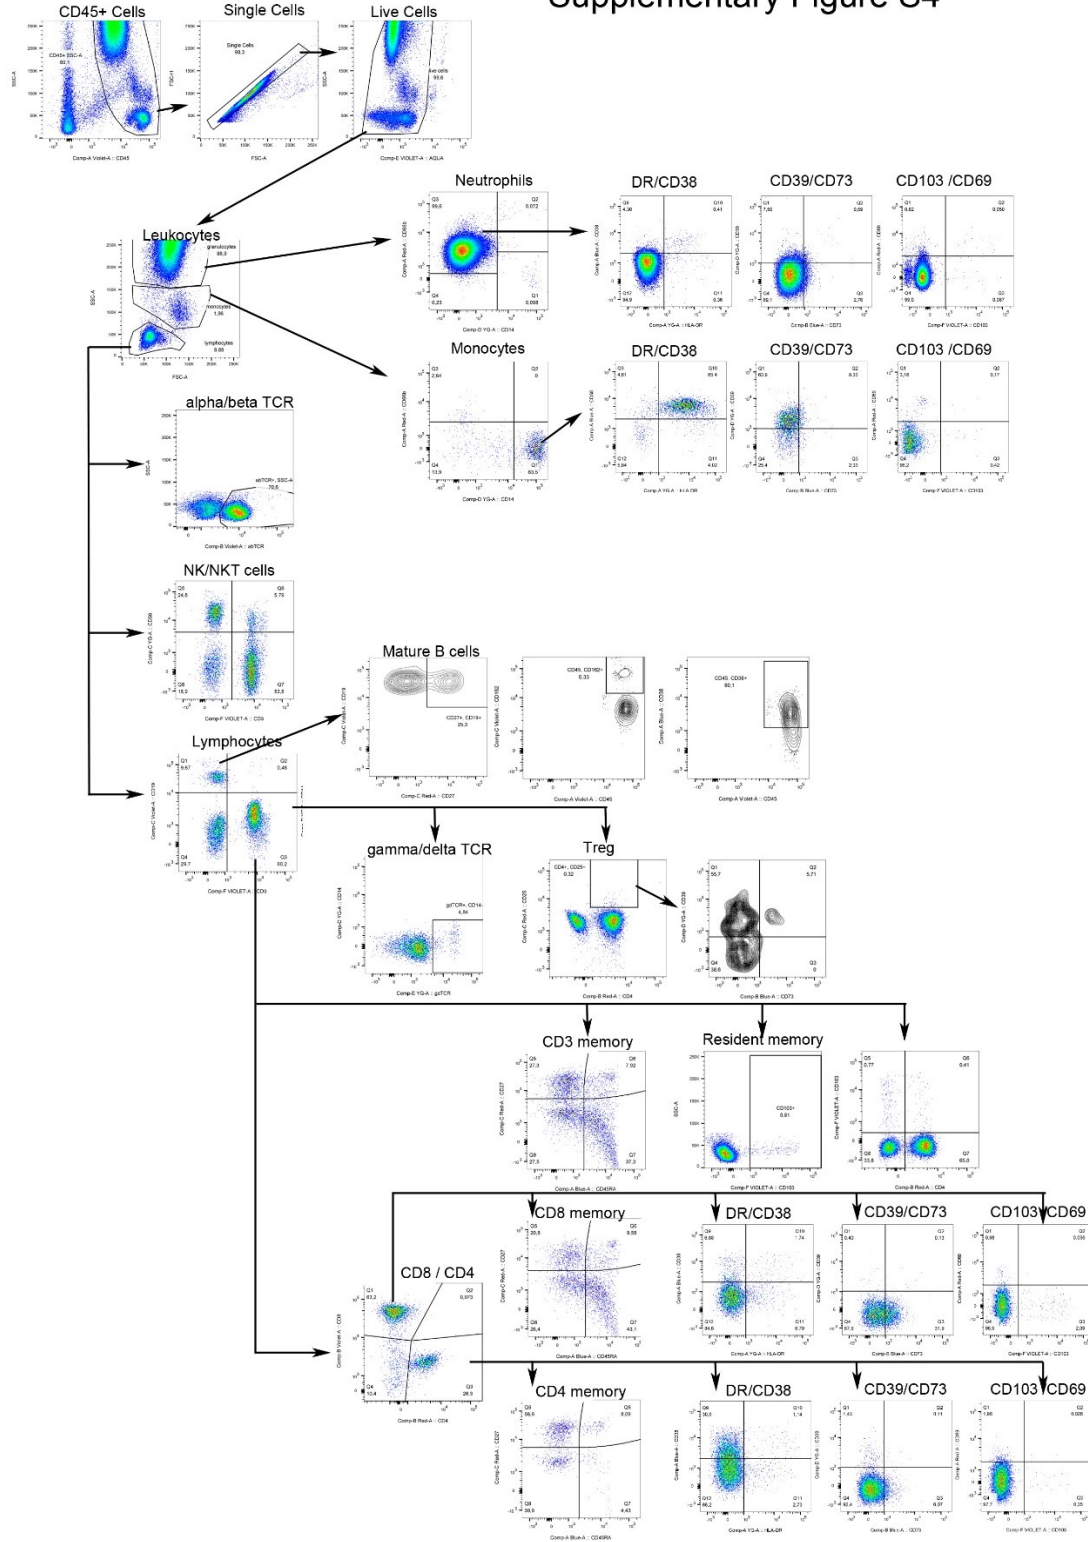

Figure S4. Strategy of gating in flow cytometry. Strategy of gating used to describe the different blood leukocyte subpopulations of our Long COVID participants.
